# Supplementary material for: Prognostic Value of Creatinine Levels at Admission on Disease Progression and Mortality in Patients with COVID-19—An Observational Retrospective Study
Source: MDPI journal article supplement (doi:10.3390/pathogens12080973), 2023-07-25

## SUPPLEMENTARY DATA

**Supplementary Table S1:** STROBE recommendations for an observational study

|                           | Item No. | Recommendation                                                                                                                                                                       | Page No. |
|---------------------------|----------|--------------------------------------------------------------------------------------------------------------------------------------------------------------------------------------|----------|
| Title and abstract        | 1        | (a) Indicate the study’s design with a commonly used term in the title or the abstract                                                                                               | 3        |
|                           |          | (b) Provide in the abstract an informative and balanced summary of what was done and what was found                                                                                  | 3        |
| <b>Introduction</b>       |          |                                                                                                                                                                                      |          |
| Background/rationale      | 2        | Explain the scientific background and rationale for the investigation being reported                                                                                                 | 4        |
| Objectives                | 3        | State specific objectives, including any prespecified hypotheses                                                                                                                     | 4        |
| <b>Methods</b>            |          |                                                                                                                                                                                      |          |
| Study design              | 4        | Present key elements of study design early in the paper                                                                                                                              | 5        |
| Setting                   | 5        | Describe the setting, locations, and relevant dates, including periods of recruitment, exposure, follow-up, and data collection                                                      | 5        |
| Participants              | 6        | (a) <i>Cohort study</i> —Give the eligibility criteria, and the sources and methods of selection of participants. Describe methods of follow-up                                      | 5        |
| Variables                 | 7        | Clearly define all outcomes, exposures, predictors, potential confounders, and effect modifiers. Give diagnostic criteria, if applicable                                             | 6        |
| Data sources/ measurement | 8        | For each variable of interest, give sources of data and details of methods of assessment (measurement). Describe comparability of assessment methods if there is more than one group | 6        |
| Bias                      | 9        | Describe any efforts to address potential sources of bias                                                                                                                            | 6        |
| Study size                | 10       | Explain how the study size was arrived at                                                                                                                                            | 5        |

|                        |    |                                                                                                                                                                                                              |                  |
|------------------------|----|--------------------------------------------------------------------------------------------------------------------------------------------------------------------------------------------------------------|------------------|
| Quantitative variables | 11 | Explain how quantitative variables were handled in the analyses. If applicable, describe which groupings were chosen and why                                                                                 | 6                |
| Statistical methods    | 12 | (a) Describe all statistical methods, including those used to control for confounding                                                                                                                        | 6                |
|                        |    | (b) Describe any methods used to examine subgroups and interactions                                                                                                                                          | 6                |
|                        |    | (c) Explain how missing data were addressed                                                                                                                                                                  | 6                |
|                        |    | (d) <i>Cohort study</i> —If applicable, explain how loss to follow-up was addressed                                                                                                                          | Figure 1         |
|                        |    | (e) Describe any sensitivity analyses                                                                                                                                                                        | 6                |
| <b>Results</b>         |    |                                                                                                                                                                                                              |                  |
| Participants           | 13 | (a) Report numbers of individuals at each stage of study—eg numbers potentially eligible, examined for eligibility, confirmed eligible, included in the study, completing follow-up, and analysed            | Figure 1, page 6 |
|                        |    | (b) Give reasons for non-participation at each stage                                                                                                                                                         | Figure 1         |
|                        |    | (c) Consider use of a flow diagram                                                                                                                                                                           | Figure 1         |
| Descriptive data       | 14 | (a) Give characteristics of study participants (eg demographic, clinical, social) and information on exposures and potential confounders                                                                     | 7                |
|                        |    | (b) Indicate number of participants with missing data for each variable of interest                                                                                                                          | 7                |
|                        |    | (c) <i>Cohort study</i> —Summarise follow-up time (eg, average and total amount)                                                                                                                             | 7                |
| Outcome data           | 15 |                                                                                                                                                                                                              |                  |
|                        |    | <i>Cohort study</i> —Report numbers of outcome events or summary measures over time                                                                                                                          | 7                |
| Main results           | 16 | (a) Give unadjusted estimates and, if applicable, confounder-adjusted estimates and their precision (eg, 95% confidence interval). Make clear which confounders were adjusted for and why they were included | 8                |
|                        |    | (b) Report category boundaries when continuous variables were categorized                                                                                                                                    | 7                |

|                          |    |                                                                                                                                                                            |    |
|--------------------------|----|----------------------------------------------------------------------------------------------------------------------------------------------------------------------------|----|
|                          |    | (c) If relevant, consider translating estimates of relative risk into absolute risk for a meaningful time period                                                           | NA |
| Other analyses           | 17 | Report other analyses done—eg analyses of subgroups and interactions, and sensitivity analyses                                                                             | 7  |
| <b>Discussion</b>        |    |                                                                                                                                                                            |    |
| Key results              | 18 | Summarise key results with reference to study objectives                                                                                                                   | 8  |
| Limitations              | 19 | Discuss limitations of the study, taking into account sources of potential bias or imprecision.<br>Discuss both direction and magnitude of any potential bias              | 10 |
| Interpretation           | 20 | Give a cautious overall interpretation of results considering objectives, limitations, multiplicity of analyses, results from similar studies, and other relevant evidence | 10 |
| Generalisability         | 21 | Discuss the generalisability (external validity) of the study results                                                                                                      | 10 |
| <b>Other information</b> |    |                                                                                                                                                                            |    |
| Funding                  | 22 | Give the source of funding and the role of the funders for the present study and, if applicable, for the original study on which the present article is based              | 11 |

**Supplementary Table S2:** Demographic, clinical and laboratory variable of patients grouped by outcome.

|                                                                 | <b>Patients with Mild<br/>outcome<br/>Nº: 646</b> | <b>Patients with Moderate<br/>outcome<br/>Nº: 299</b> | <b>Patients with<br/>Severe outcome<br/>or dead during<br/>hospitalization<br/>Nº: 412</b> | <b>Univariate<br/>analysis</b> |
|-----------------------------------------------------------------|---------------------------------------------------|-------------------------------------------------------|--------------------------------------------------------------------------------------------|--------------------------------|
|                                                                 |                                                   |                                                       |                                                                                            | <b>p-value</b>                 |
| <b>Males*</b>                                                   | 396(61.3)                                         | 175(58.5)                                             | 157(38.1)                                                                                  | 0.631 <sup>a</sup>             |
| <b>Age, years**</b>                                             | 59(48-70)                                         | 61(51-71)                                             | 67(57-79)                                                                                  | 0.001 <sup>b</sup>             |
| <b>Charlson comorbidity index**</b>                             | 2(1-3)                                            | 2(1-4)                                                | 3(2-5)                                                                                     | 0.001 <sup>c</sup>             |
| <b>Days from symptom onset to admission<br/>to hospital**</b>   | 7(3-10)                                           | 8(4-10)                                               | 7(3-10)                                                                                    | 0.165 <sup>c</sup>             |
| <b>Patients with hypertension*</b>                              | 267(41.3)                                         | 145(48.5)                                             | 214(51.9)                                                                                  | 0.002 <sup>a</sup>             |
| <b>Patients with cardio-vascular disease*</b>                   | 144(22.3)                                         | 69(23.1)                                              | 136(33)                                                                                    | 0.001 <sup>a</sup>             |
| <b>Patients with diabetes*</b>                                  | 107(16.6)                                         | 52(17.4)                                              | 87(21.1)                                                                                   | 0.161 <sup>a</sup>             |
| <b>Patients with chronic obstructive<br/>pulmonary disease*</b> | 46(7.1)                                           | 25(8.4)                                               | 48(11.7)                                                                                   | 0.039 <sup>a</sup>             |
| <b>Patients with chronic liver disease*</b>                     | 24(3.7)                                           | 8(2.7)                                                | 13(3.2)                                                                                    | 0.679 <sup>a</sup>             |

|                                                                   |                  |                  |                  |                    |
|-------------------------------------------------------------------|------------------|------------------|------------------|--------------------|
| <b>Patients with malignancy*</b>                                  | 38(5.9)          | 14(4.7)          | 33(8)            | 0.165 <sup>a</sup> |
| <b>Patients with dementia*</b>                                    | 24(3.7)          | 7(2.3)           | 35(8.6)          | 0.001 <sup>a</sup> |
| <b>Patients with obesity*</b>                                     | 55(10.2)         | 16(8.0)          | 43(13.1)         | 0.165 <sup>a</sup> |
| <b>PaO<sub>2</sub>/FiO<sub>2</sub> Ratio (P/F) at admission**</b> | 290(191-348)     | 238(149-300)     | 155(112-245)     | 0.001              |
| <b>Blood creatinine value **</b>                                  | 0.8(0.7-1.00)    | 0.8(0.7-1.00)    | 0.89(0.7-1.10)   | 0.040 <sup>c</sup> |
| <b>Patients with creatinine more than 1.12 mg/dl*</b>             | 79(12.2)         | 44(14.7)         | 102(24.8)        | 0.001 <sup>a</sup> |
| <b>eGFR CKD-EPI 2021 at admission**</b>                           | 96.5(79.3-107.3) | 94.0(75.1-104.2) | 89.2(63.8-102.1) | 0.001 <sup>c</sup> |

**Footnotes:** \* N°(%) of patients; \*\*Median (Q1-Q3); a, Chi-square test; b, t-student test; c,Mann Whitney test.

**Supplementary Figure S1:** Box plot of creatinine value grouped considering hospital discharge or death during hospitalization.

**Supplementary Figure S2:** ROC curve of creatinine levels considering death during hospitalization.

Supplementary Figure S1

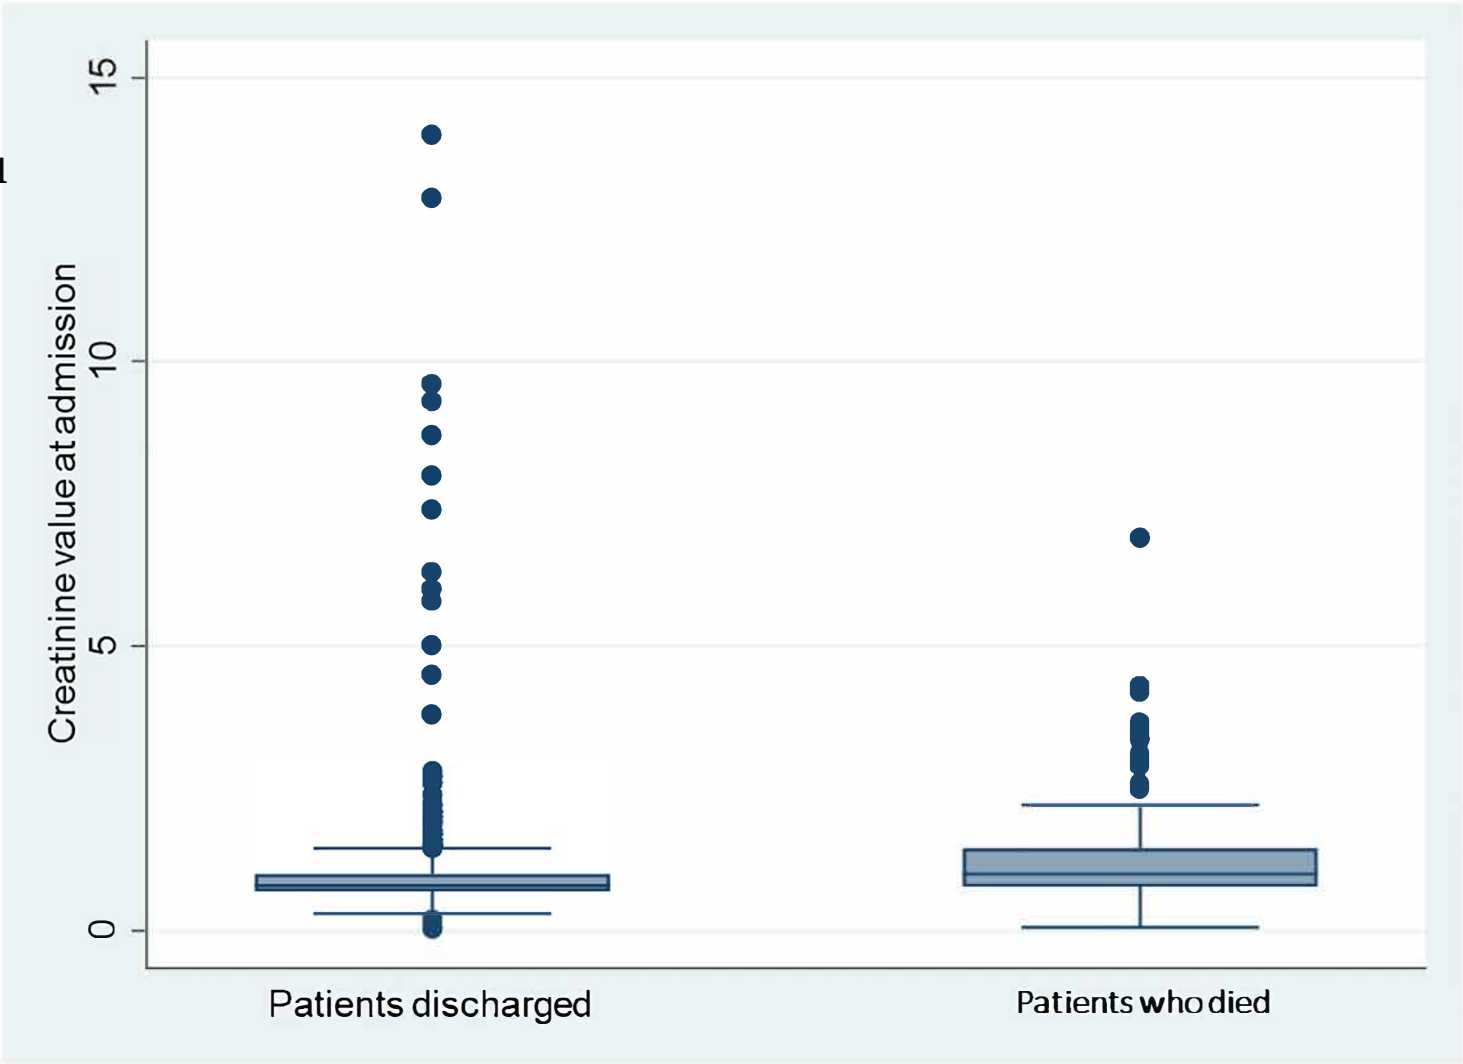

Supplementary Figure S2

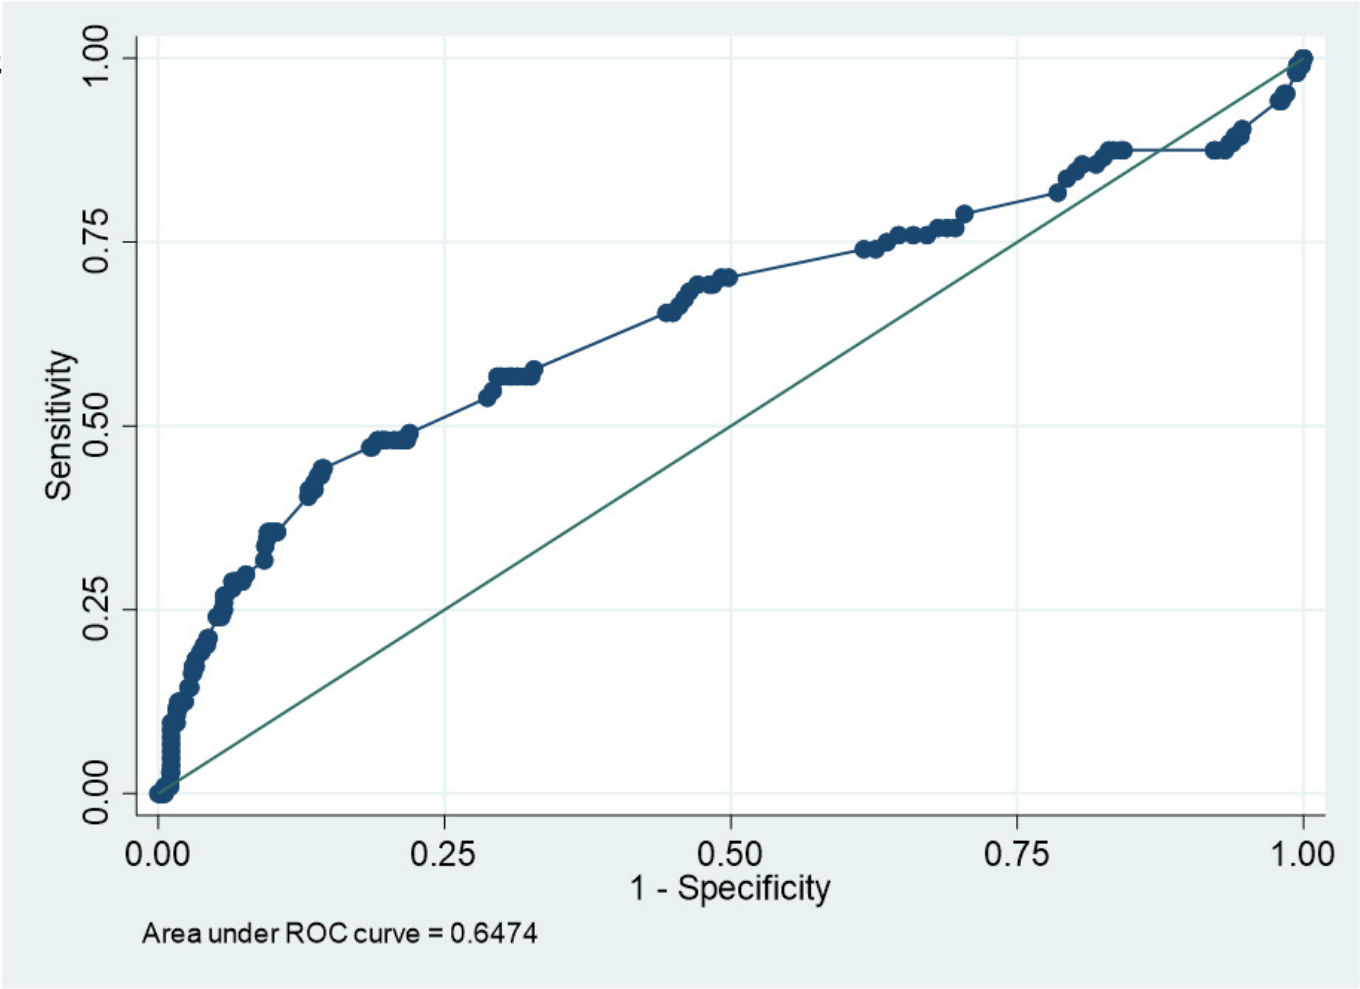

Supplement: s1 [file s1]
